# Supplementary material for: Evolution of species interactions determines microbial community productivity in new environments
Source: PubMed Central journal article supplement (PMC4409166; doi:10.1038/ismej.2014.215), 2014-11-11
Supplement: ismej2014215x1.pdf [file ismej2014215x1.pdf]

1 SUPPLEMENTARY FIGURES

2 FIGURE S1

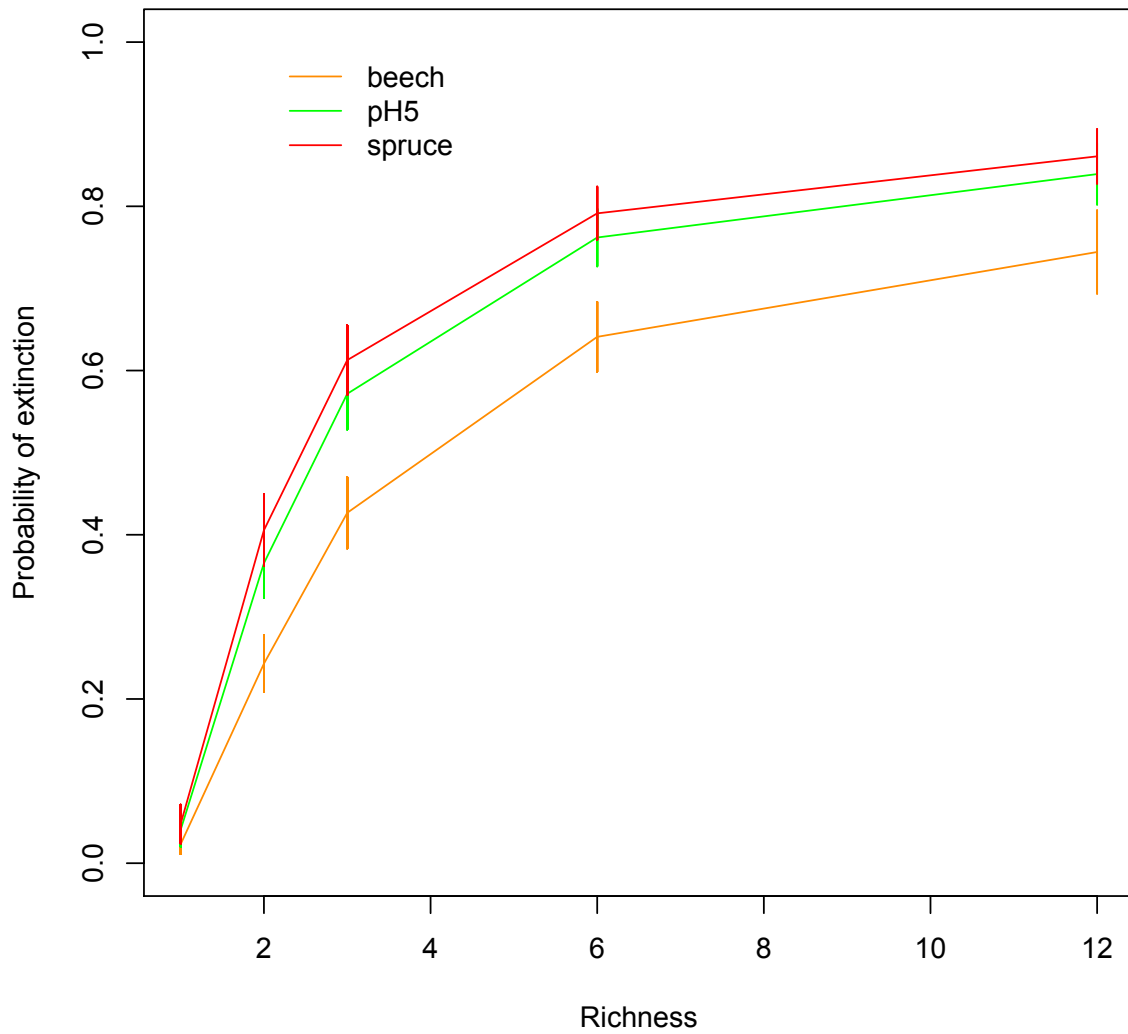

3

4 **Figure S1.** The probability of extinction per species during the experiment in communities of  
5 different species richness and in the three environments: orange = beech tea; green = pH5  
6 beech tea and red = spruce tea. Predicted probabilities with standard errors from a general  
7 linear regression with binomial errors are shown, treating richness as a factor.

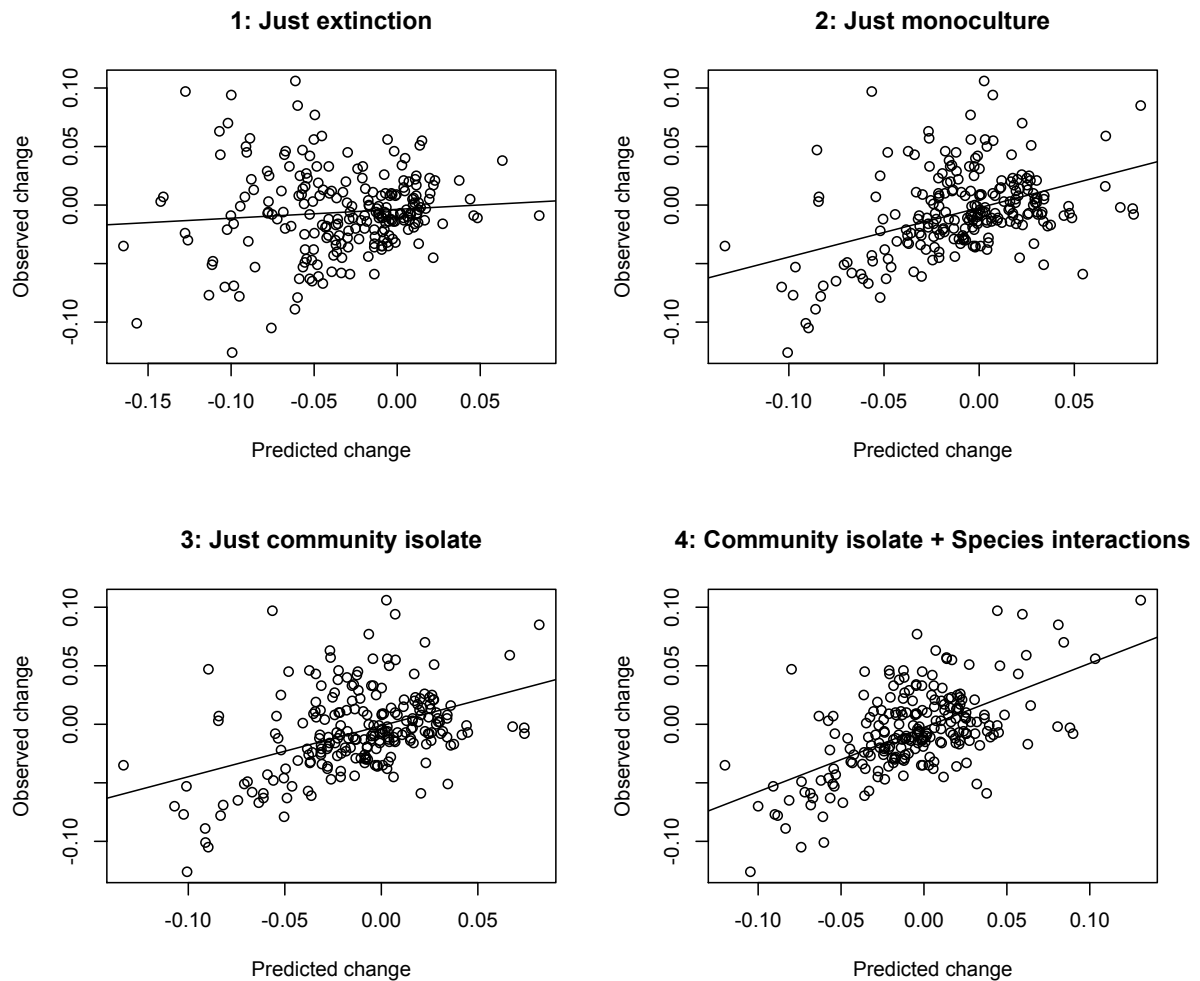

9

10

11 **Figure S2.** The observed change in community yields plotted against the four alternative  
 12 predictors of community changes outlined in table 2. Model 1 predicts changes if the only  
 13 change between week 0 and week 5 was the loss of species that were extinct by the end.  
 14 Model 2 predicts changes based solely on changes in monoculture yields between week 0 and  
 15 week 5. Model 3 uses species isolates from final communities to estimate changes in the sum  
 16 of monoculture yields for each community. Model 4 uses the same predictor as model 2, but  
 17 fits a new slope for each environment X richness combination, i.e. that the strength of species  
 18 interactions has changed. Full descriptions are given in table 2 and main text.

19 FIGURE S3

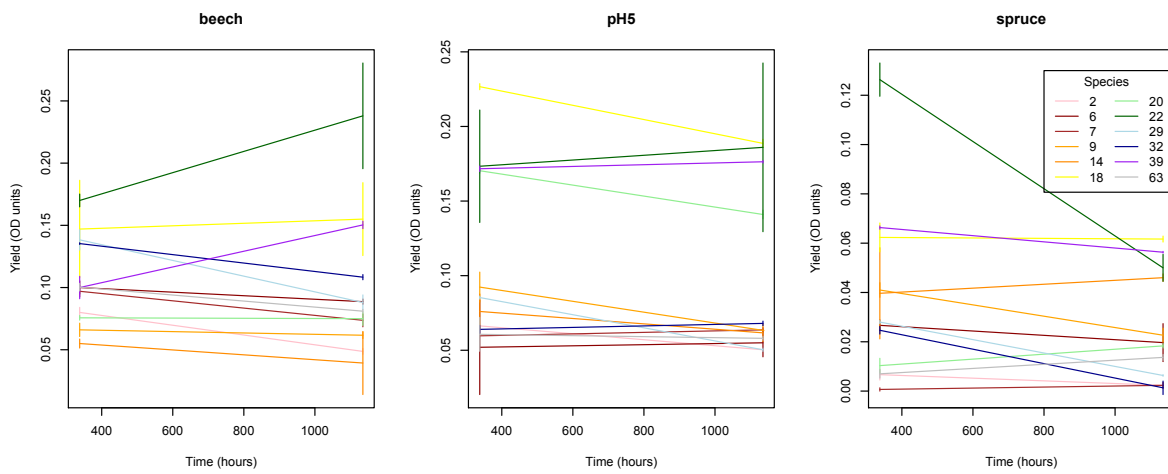

20

21 **Figure S3.** The yields of each species in monoculture at the start and end of the experiment  
22 in the three environments: control beech tea, pH5 beech tea and spruce tea. Standard errors  
23 are shown.

24

25 **Supplementary tables**

26 **Table S1** - Composition of the experimental communities. Species numbers refer to numbers  
 27 in table 1, e.g. 2,6 indicates that THB2 and THB6 were present. Composition Y had all 12  
 28 species together. Monocultures were labelled by their species number.

| Composition | Species | Composition | Species          |
|-------------|---------|-------------|------------------|
| A           | 2,6     | M           | 2,22,29          |
| B           | 22,39   | N           | 9,18,39          |
| C           | 29,63   | O           | 7,20,63          |
| D           | 9,18    | P           | 6,14,32          |
| E           | 14,32   | Q           | 22,32,63         |
| F           | 7,20    | R           | 2,7,18           |
| G           | 7,18    | S           | 14,20,29         |
| H           | 14,20   | T           | 6,9,39           |
| I           | 2,29    | U           | 9,14,18,20,29,32 |
| J           | 9,63    | V           | 2,6,7,22,39,63   |
| K           | 6,22    | W           | 6,7,9,18,32,63   |
| L           | 32,39   | X           | 2,14,20,22,29,39 |

29

30 **Table S2** - Results of 16S sequencing to check morphological identification of final isolates  
 31 from high diversity treatments. Red = mis- or un-identified based on morphology. Final  
 32 isolate name: Environment\_CompositionReplicate\_Morphological ID.

| Starting isolate | Name           | Final isolate | Starting isolate | Name | Final isolate |
|------------------|----------------|---------------|------------------|------|---------------|
| THB6             | Flavobacterium | BT_V1_6       | THB18            |      | ph5_W3_18     |
|                  |                | BT_V3_6       | continued        |      | pH5_Y1_18     |
|                  |                | ST_V1_6       |                  |      | pH5_Y3_18     |
|                  |                | ST_V2_6       |                  |      | ST_U1_18      |
|                  |                | ST_V3_6       |                  |      | ST_U2_18      |
|                  |                | ST_W1_6       |                  |      | ST_U3_18      |
|                  |                | ST_W2_6       |                  |      | ST_W3_18      |

|       |                       |            |       |                              |           |
|-------|-----------------------|------------|-------|------------------------------|-----------|
|       |                       | ST_T1_9    |       |                              | ST_Y1_18  |
|       |                       | ST_T2_9    |       |                              | ST_Y2_18  |
|       |                       | ST_T3_9    |       |                              | ST_Y3_18  |
| THB7  | Flavobacterium        | BT_W1_7    |       |                              | BT_Y2_14  |
|       |                       | BT_W2_7    |       |                              | BT_Y3_14  |
|       |                       | BT_W3_7    |       |                              | pH5_Y3_14 |
|       |                       | BT_Y2_yell | THB22 | Pseudomonas<br>trivialis+B10 | pH5_Y2_14 |
|       |                       | BT_Y1_7_   |       |                              | ST_Y2_14  |
|       |                       | ph5_Y3_7   |       |                              | pH5_Y2_18 |
|       |                       | BT_Y1_6_   |       |                              | ph5_Y3_20 |
| THB14 | Yersinia ruckeri      | BT_U1_14   |       |                              | ST_Y2_20  |
|       |                       | BT_U3_14   |       |                              | BT_Y3_22  |
|       |                       | BT_Y1_14   |       |                              | ph5_V1_22 |
|       |                       | ph5_Y1_14  |       |                              | ph5_V2_22 |
|       |                       | ph5_U1_14  |       |                              | ph5_V3_22 |
|       |                       | ST_U1_14   |       |                              | ph5_X1_22 |
|       |                       | ST_U2_14   |       |                              | ph5_X2_22 |
|       |                       | ST_U3_14   |       |                              | ph5_X3_22 |
|       |                       | ST_X1_14   |       |                              | pH5_Y1_22 |
|       |                       | ST_X2_14   |       |                              | pH5_Y2_22 |
|       |                       | ST_X3_14   |       |                              | ST_V2_22  |
|       |                       | ST_Y1_14   |       |                              | ST_V3_22  |
|       |                       | ST_Y3_14   |       |                              | ST_X2_22  |
| THB18 | Pseudomonas<br>veroni | D1_18      |       |                              | ST_X1_22  |
|       |                       | D3_18      |       |                              | ST_X3_22  |
|       |                       | D1_181     |       |                              | ST_Y2_22  |
|       |                       | D3_181     | THB29 | Novosphingobium              | C3_29     |
|       |                       | BT_U1_18   |       |                              | C3_291    |
|       |                       | BT_U3_18   |       |                              | I1_29     |

|           |       |                  |          |
|-----------|-------|------------------|----------|
| BT_Y1_18  |       |                  | I2_29    |
| BT_Y2_18  |       |                  | I3_29    |
| BT_Y3_18  |       |                  | I1_291   |
| ph5_U1_18 |       |                  | I2_291   |
| ph5_U3_18 |       |                  | I3_291   |
| ph5_W1_18 | THB32 | Chryseobacterium | BT_V1_7_ |
| ph5_W2_18 |       |                  |          |

33

34

35 **Table S3** – Linear model of microcosm yields at the start of the experiment following  
 36 transfer into the three environments:  $F_{5,327}=52.0$ ,  $R^2=0.43$ ,  $p<0.0001$ .

|                                | <u>Estimate</u> | <u>Standard Error</u> | <u>t</u> | <u>p</u> |
|--------------------------------|-----------------|-----------------------|----------|----------|
| Intercept                      | 0.1019          | 0.0063                | 16.22    | <0.0001  |
| log(richness)                  | 0.0142          | 0.0065                | 2.19     | 0.0295   |
| Treatment.pH5                  | 0.0046          | 0.0089                | 0.52     | 0.6031   |
| Treatment.spruce               | -0.0667         | 0.0089                | -7.51    | <0.0001  |
| log(richness):treatment.pH5    | 0.0224          | 0.0092                | 2.43     | 0.0157   |
| log(richness):treatment.spruce | 0.0070          | 0.0092                | 0.76     | 0.4486   |

37

38 **Table S4.** Linear model of microcosm yields based on the sum of species yields, richness and  
 39 treatments at the start of the experiment

|                               | <u>Estimate</u> | <u>Standard Error</u> | <u>t</u> | <u>p</u> |
|-------------------------------|-----------------|-----------------------|----------|----------|
| Intercept                     | 0.0029          | 0.0111                | 0.27     | 0.791    |
| Sum.species.yields            | 0.5541          | 0.0521                | 10.65    | <0.0001  |
| log(richness)                 | 0.0094          | 0.0093                | 1.01     | 0.312    |
| Treatment.pH5                 | 0.0267          | 0.0057                | 4.73     | <0.0001  |
| Treatment.spruce              | 0.0086          | 0.0088                | 0.98     | 0.33     |
| Sum.species.yields X richness | -0.1921         | 0.0199                | -9.64    | <0.0001  |

40

41 **Table S5** – Linear mixed effects model of microcosm yields over the course of the  
 42 experiment.

| <u>Fixed effects</u>                | <u>Value</u> | <u>Standard</u>  |           | <u>t-value</u> | <u>p-value</u> |
|-------------------------------------|--------------|------------------|-----------|----------------|----------------|
|                                     |              | <u>Error</u>     | <u>DF</u> |                |                |
| Intercept                           | 0.101281     | 0.007110         | 1321      | 14.24          | <0.0001        |
| Time                                | -0.000006    | 0.000006         | 1321      | -1.05          | 0.2938         |
| log(richness)                       | 0.016784     | 0.007369         | 327       | 2.28           | 0.0234         |
| Treatment.pH5                       | 0.009676     | 0.010060         | 327       | 0.96           | 0.3369         |
| Treatment.spruce                    | -0.051495    | 0.010054         | 327       | -5.12          | <0.0001        |
| Time:log(richness)                  | 0.000002     | 0.000006         | 1321      | 0.35           | 0.7228         |
| Time:treatment.pH5                  | -0.000012    | 0.000008         | 1321      | -1.47          | 0.1422         |
| Time:treatment.spruce               | -0.000019    | 0.000008         | 1321      | -2.38          | 0.0174         |
| log(richness):treatment.pH5         | 0.007254     | 0.010424         | 327       | 0.70           | 0.487          |
| log(richness):treatment.spruce      | 0.006171     | 0.010420         | 327       | 0.59           | 0.5541         |
| Time:log(richness):treatment.pH5    | 0.000024     | 0.000008         | 1321      | 2.97           | 0.003          |
| Time:log(richness):treatment.spruce | -0.000010    | 0.000008         | 1321      | -1.22          | 0.2219         |
|                                     |              |                  |           |                |                |
|                                     |              | <u>Standard</u>  |           |                |                |
| <u>Random effects</u>               |              | <u>Deviation</u> |           |                |                |
| Intercept                           |              | 3.90E-02         |           |                |                |
| Residual                            |              | 2.53E-02         |           |                |                |

43

44 **Table S6** – Linear mixed effects model of microcosm yields over the course of the  
 45 experiment against the sum of species yields. Species yields in week 5 were measured using  
 46 monoculture isolates.

| <u>Fixed effects</u> | <u>Value</u> | <u>Standard</u> |           | <u>t-value</u> | <u>p-value</u> |
|----------------------|--------------|-----------------|-----------|----------------|----------------|
|                      |              | <u>Error</u>    | <u>DF</u> |                |                |
| Intercept            | 0.03392      | 0.01309         | 221       | 2.59           | 0.0102         |
| Sum.species.yields   | 0.38376      | 0.04381         | 215       | 8.76           | 0              |
| log(richness)        | 0.01613      | 0.00924         | 221       | 1.75           | 0.0822         |

|                                      |          |         |     |       |        |
|--------------------------------------|----------|---------|-----|-------|--------|
| treatment.pH5                        | 0.01764  | 0.01251 | 221 | 1.41  | 0.1599 |
| treatment.spruce                     | -0.02125 | 0.01296 | 221 | -1.64 | 0.1024 |
| time                                 | -0.00001 | 0.00001 | 215 | -1.48 | 0.1413 |
| Sum.species.yields:log(richness)     | -0.14424 | 0.01661 | 215 | -8.68 | 0      |
| Sum.species.yields:treatment.pH5     | 0.00439  | 0.02850 | 215 | 0.15  | 0.8776 |
| Sum.species.yields:treatment.spruce  | 0.07222  | 0.05556 | 215 | 1.30  | 0.195  |
| Sum.species.yields:time              | 0.00003  | 0.00002 | 215 | 1.25  | 0.2113 |
| treatmentpH5:time                    | -0.00001 | 0.00001 | 215 | -0.43 | 0.6673 |
| treatmentspruce:time                 | 0.00001  | 0.00001 | 215 | 0.75  | 0.4518 |
| Sum.species.yields:treatment.pH5:    |          |         |     |       |        |
| time                                 | 0.00008  | 0.00003 | 215 | 2.86  | 0.0046 |
| Sum.species.yields:treatment.spruce: |          |         |     |       |        |
| time                                 | -0.00010 | 0.00008 | 215 | -1.33 | 0.1855 |

Standard

Random effects

Deviation

|           |        |
|-----------|--------|
| Intercept | 0.0258 |
| Residual  | 0.0238 |

47

48

49 **Table S7.** Comparison of alternative predictors of the change in community yields between  
50 week 0 and week 5: alternative version to table 2. The baseline linear model at time 0  
51 modeled community yields as  $\beta_{t=0}(E, S, \sum a_{i,t=0} \varepsilon_{i,j})$ , i.e. excluding monoculture yields of  
52 species that went extinct by the end. Final richness (i.e.  $\sum \varepsilon_{i,j}$  for each community  $j$ ) was used  
53 in all the models instead of starting richness. To test whether starting richness had an  
54 additional effect we fitted versions of model 8 including both starting and final richness: both  
55 variables were retained in the simplified model, which was preferred over a model with just  
56 final richness alone (ANOVA,  $F_6=7.2$ ,  $p<0.0001$ ).

57

|   | Predictor of final yields                             | Description              | AIC    | Adjusted R2 | t    | p       |
|---|-------------------------------------------------------|--------------------------|--------|-------------|------|---------|
| 6 | $\beta_{t=0}(E, S, \sum a_{i,t=5} \varepsilon_{i,j})$ | Monoculture changes only | -915.6 | 0.215       | 7.88 | <0.0001 |



|   |                                                           |                                                             |        |       |      |         |
|---|-----------------------------------------------------------|-------------------------------------------------------------|--------|-------|------|---------|
| 7 | $\beta_{t=0}(E, S, \Sigma b_{i,j,t=5} \varepsilon_{i,j})$ | Monoculture changes only (measured from community isolates) | -911.8 | 0.201 | 7.58 | <0.0001 |
| 8 | $\beta_{t=5}(E, S, \Sigma a_{i,t=5} \varepsilon_{i,j})$   | Monoculture plus species interactions changes               | -952.3 | 0.333 | 10.9 | <0.0001 |
| 9 | $\beta_{t=5}(E, C, \Sigma a_{i,t=5} \varepsilon_{i,j})$   | Monoculture + species interactions by composition           | -1331  | 0.876 | 39.8 | <0.0001 |

58

59  $a_{i,t=x}$  - monoculture yields of each species  $i$  at time  $x$

60  $\beta_{t=0}(E, S)$  – slopes fitted between community yields and  $\Sigma(a_{i,t=0} d_{i,j})$  at  $t=0$  in each  
61 environment,  $E$ , and final richness level,  $S$ .

62  $\varepsilon_{i,j}$  - the survival (1) or extinction (0) of each species in community  $j$  by the end

63  $b_{i,t=5}$  - monoculture yields of isolates of species  $i$  extracted from community  $j$  at  $t=5$

64  $C$  – a factor with levels denoting each community composition

65

66 **Table S8.** Simplified linear mixed effect model of community yields fitted with separate  
67 coefficients for each species in each environment and that vary over time. Note a full model  
68 including interaction terms with richness as well for all species could not be fitted. ANOVA  
69 of fixed effects is shown for conciseness.

| Fixed effect  | numDF | denDF | F-value | p-value        |
|---------------|-------|-------|---------|----------------|
| Intercept     |       | 1     | 194     | 4945.24 <.0001 |
| log(richness) |       | 1     | 185     | 132.631 <.0001 |
| environment   |       | 2     | 185     | 391.819 <.0001 |
| time          |       | 1     | 194     | 10.697 0.0013  |
| spec.2        |       | 1     | 185     | 1.4 0.2383     |
| spec.6        |       | 1     | 185     | 8.627 0.0037   |
| spec.7        |       | 1     | 185     | 6.096 0.0145   |
| spec.9        |       | 1     | 185     | 2.622 0.1071   |
| spec.14       |       | 1     | 185     | 22.937 <.0001  |
| spec.18       |       | 1     | 185     | 85.077 <.0001  |

|                           |   |     |         |        |
|---------------------------|---|-----|---------|--------|
| spec.20                   | 1 | 185 | 16.535  | 0.0001 |
| spec.22                   | 1 | 185 | 110.065 | <.0001 |
| spec.29                   | 1 | 185 | 6.849   | 0.0096 |
| spec.32                   | 1 | 185 | 67.451  | <.0001 |
| spec.39                   | 1 | 185 | 10.197  | 0.0017 |
| spec.63                   | 1 | 185 | 50.454  | <.0001 |
| log(richness):environment | 2 | 185 | 15.605  | <.0001 |
| environment:time          | 2 | 194 | 11.807  | <.0001 |
| time:spec.2               | 1 | 194 | 0.176   | 0.6752 |
| environment:spec.2        | 2 | 185 | 2.4     | 0.0936 |
| time:spec.6               | 1 | 194 | 6.547   | 0.0113 |
| environment:spec.6        | 2 | 185 | 5.771   | 0.0037 |
| time:spec.7               | 1 | 194 | 0.574   | 0.4494 |
| environment:spec.7        | 2 | 185 | 18.9    | <.0001 |
| time:spec.9               | 1 | 194 | 0.313   | 0.5766 |
| time:spec.14              | 1 | 194 | 12.271  | 0.0006 |
| environment:spec.14       | 2 | 185 | 6.644   | 0.0016 |
| time:spec.18              | 1 | 194 | 7.612   | 0.0064 |
| environment:spec.18       | 2 | 185 | 4.178   | 0.0168 |
| time:spec.20              | 1 | 194 | 2.171   | 0.1423 |
| environment:spec.20       | 2 | 185 | 11.149  | <.0001 |
| time:spec.22              | 1 | 194 | 3.579   | 0.06   |
| environment:spec.22       | 2 | 185 | 9.313   | 0.0001 |
| time:spec.29              | 1 | 194 | 2.251   | 0.1351 |
| environment:spec.29       | 2 | 185 | 2.683   | 0.071  |
| time:spec.32              | 1 | 194 | 2.429   | 0.1207 |
| environment:spec.32       | 2 | 185 | 10.573  | <.0001 |
| time:spec.39              | 1 | 194 | 0.603   | 0.4385 |
| environment:spec.39       | 2 | 185 | 1.692   | 0.1871 |
| time:spec.63              | 1 | 194 | 2.501   | 0.1154 |
| environment:spec.63       | 2 | 185 | 3.807   | 0.024  |
| environment:time:spec.2   | 2 | 194 | 7.431   | 0.0008 |
| environment:time:spec.6   | 2 | 194 | 2.974   | 0.0534 |

|                          |   |     |        |        |
|--------------------------|---|-----|--------|--------|
| environment:time:spec.18 | 2 | 194 | 3.096  | 0.0475 |
| environment:time:spec.20 | 2 | 194 | 12.614 | <.0001 |
| environment:time:spec.22 | 2 | 194 | 15.376 | <.0001 |
| environment:time:spec.29 | 2 | 194 | 1.884  | 0.1548 |
| environment:time:spec.32 | 2 | 194 | 5.33   | 0.0056 |
| environment:time:spec.39 | 2 | 194 | 2.416  | 0.0919 |

70

71 **Table S9.** Simplified linear mixed effect model of community yields in pH5 tea fitted with  
72 separate coefficients for each species that vary over time. Note a full model including  
73 interaction terms with richness as well for all species could not be fitted.

|               | Value    | Std.Error | DF | t-value | p-value |
|---------------|----------|-----------|----|---------|---------|
| Intercept     | 0.09678  | 0.01222   | 70 | 7.92    | 0       |
| log(richness) | 0.09204  | 0.02310   | 63 | 3.98    | 0.0002  |
| time          | -0.00003 | 0.00001   | 70 | -4.08   | 0.0001  |
| spec.2        | -0.04386 | 0.01203   | 63 | -3.65   | 0.0005  |
| spec.6        | -0.03777 | 0.01419   | 63 | -2.66   | 0.0098  |
| spec.7        | 0.03689  | 0.01219   | 63 | 3.03    | 0.0036  |
| spec.18       | 0.03857  | 0.01297   | 63 | 2.97    | 0.0042  |
| spec.20       | -0.04237 | 0.01574   | 63 | -2.69   | 0.0091  |
| spec.22       | 0.01570  | 0.01362   | 63 | 1.15    | 0.2535  |
| spec.29       | -0.02056 | 0.01253   | 63 | -1.64   | 0.1058  |
| spec.32       | -0.06178 | 0.01053   | 63 | -5.87   | 0       |
| spec.39       | -0.01231 | 0.01376   | 63 | -0.89   | 0.3744  |
| spec.63       | -0.06044 | 0.01131   | 63 | -5.35   | 0       |
| time:spec.6   | 0.00002  | 0.00001   | 70 | 1.64    | 0.1052  |
| time:spec.20  | 0.00005  | 0.00001   | 70 | 4.76    | 0       |
| time:spec.22  | 0.00004  | 0.00001   | 70 | 3.04    | 0.0033  |
| time:spec.39  | 0.00002  | 0.00001   | 70 | 1.81    | 0.0747  |

74

## 75 **Supporting Methods S1**

76 *16S sequencing*

77 We amplified and sequenced the 16S rRNA gene of each isolate using the primers 8–27 (5'-  
78 AGA GTT TGA TCC TGG CTC AG-3') and 1,512–1,492 (5'-ACG GTT ACC TTG TTA  
79 CGA CTT-3'). We added 0.6 $\mu$ M each primer for 25 $\mu$ l of PCR reaction using Illustra PureTaq  
80 Ready-To-Go PCR Beads (GE Healthcare, Little Chalfont, Buckinghamshire, UK). PCR  
81 conditions were 94°C for 4 minutes, 30 cycles of 94°C for 1 minute, 50°C for 1 minutes and  
82 72°C for 2 min, with a final extension of 72°C for 10 minutes.

### 83 *Media preparation*

84 Media prepared from beech and spruce leaves were supplemented with R2A agar ingredients:  
85 0.375g proteose peptone, 0.375g casein hydrolysate, 0.375g yeast extract, 0.375g glucose,  
86 0.374 g soluble starch, 0.225g dipotassium phosphate, 0.0375g magnesium sulphate, 0.225g  
87 sodium pyruvate per litre. Beech tea and spruce tea media initially had a pH of 7.1 and 6.8  
88 respectively and were buffered to pH7 using 100mM phosphate buffer (5.8g/l monosodium  
89 phosphate and 8.2g/l disodium phosphate added). Beech tea for the pH5 treatment was  
90 buffered to pH5 by adding 13.6g/l monosodium phosphate and 0.2g/l disodium phosphate.

91 In some microcosms (those containing THB29 or THB39) a biofilm was sometimes present  
92 at the point of transfer. Before transferring to the fresh media and before reading the OD, we  
93 mixed the culture by pipetting up and down ~10 times. Samples were taken from half way  
94 between the surface and the bottom of the culture, and avoiding the walls of the bottle.

95

### 96 **Supporting Results S1**

97 One possible reason why extinction had little effect is that the species that had gone extinct  
98 by the end were already contributing little to community yields at the start. We tested this by  
99 refitting community yields at the start of the experiment to the sum of monoculture yields,  
100 but excluding species that were extinct by the end from the calculation and using final  
101 richness instead of starting richness. This measure indeed explained starting community  
102 yields better than the sum of all species present at the start (AIC=-936.5 versus 867.8).  
103 However, using this measure and the final richness for models led to the same conclusions  
104 regarding the roles of additive evolution versus evolution in interactions (table S7). Note that  
105 starting richness explained residual variation in these models (table S7), indicating that our  
106 starting treatments retained an effect, even though species richness declined over time.
